# Supplementary material
Source: PubMed Central journal article supplement (PMC3715279)
Supplement: gmb-36-149-s001.pdf [file gmb-36-149-s001.pdf]

Table S1. mtDNA haplogroup frequencies of Colombian and South America Amerindian tribes belonging to the Chibcha, Tucano-Equatorial, Andean and Ge-Pano-Carib linguistic families, as well as some Colombian African-descendant populations, and African population used for NM-MDS analysis.

| Population                            | N   | A    | B    | C    | D    | E    | Diversity |
|---------------------------------------|-----|------|------|------|------|------|-----------|
| 1. Tatuyo (Col) <sup>1</sup>          | 10  | 40,0 | 0,0  | 50,0 | 10,0 | 0,0  | 0,644     |
| 2. Guanana (Col) <sup>1</sup>         | 10  | 20,0 | 0,0  | 20,0 | 50,0 | 10,0 | 0,733     |
| 3. Guahibo (Col) <sup>23,5</sup>      | 40  | 53,0 | 2,0  | 10,0 | 0,0  | 35,0 | 0,606     |
| 4. Saliva (Col) <sup>23</sup>         | 13  | 15,0 | 0,0  | 55,0 | 15,0 | 15,0 | 0,692     |
| 5. Ticuna (Col) <sup>5,23,31</sup>    | 238 | 15,0 | 12,0 | 36,0 | 37,0 | 0,0  | 0,699     |
| 6. Zoro (Bra) <sup>17</sup>           | 30  | 20,0 | 7,0  | 13,0 | 60,0 | 0,0  | 0,598     |
| 7. Gavião (Bra) <sup>17,28</sup>      | 43  | 9,0  | 9,0  | 0,0  | 82,0 | 0,0  | 0,328     |
| 8. Wayuu (Col) <sup>1,5,2,26</sup>    | 123 | 29,0 | 24,0 | 45,0 | 0,0  | 2,0  | 0,660     |
| 9. Ignaciano (Bol) <sup>13</sup>      | 22  | 18,0 | 36,0 | 41,0 | 0,0  | 5,0  | 0,697     |
| 10. Trinitarion (Bol) <sup>13</sup>   | 35  | 14,0 | 40,0 | 37,0 | 3,0  | 6,0  | 0,698     |
| 11. Movima (Bol) <sup>13</sup>        | 22  | 9,0  | 9,0  | 64,0 | 18,0 | 0,0  | 0,571     |
| 12. Yuracaré (Bol) <sup>13</sup>      | 28  | 39,0 | 32,0 | 21,0 | 4,0  | 4,0  | 0,720     |
| 13. Piaroa (Col) <sup>5,31</sup>      | 28  | 39,0 | 8,0  | 19,0 | 34,0 | 0,0  | 0,706     |
| 14. Wapishana (Bra) <sup>31</sup>     | 12  | 0,0  | 25,0 | 8,0  | 67,0 | 0,0  | 0,530     |
| 15. Cubeo (Col) <sup>1,23</sup>       | 46  | 30,0 | 13,0 | 40,0 | 15,0 | 2,0  | 0,730     |
| 16. Curripaco (Col) <sup>1,5,23</sup> | 44  | 27,0 | 23,0 | 50,0 | 0,0  | 0,0  | 0,686     |
| 17. Desano (Col) <sup>1,23</sup>      | 22  | 33,0 | 7,0  | 22,0 | 38,0 | 0,0  | 0,740     |
| 18. Piapoco (Col) <sup>1,23</sup>     | 47  | 15,0 | 14,0 | 20,0 | 9,0  | 42,0 | 0,747     |
| 19. Puinave (Col) <sup>1,23</sup>     | 80  | 6,0  | 33,0 | 46,0 | 11,0 | 4,0  | 0,671     |

|                                         |             |             |             |             |             |            |              |
|-----------------------------------------|-------------|-------------|-------------|-------------|-------------|------------|--------------|
| 20. Suruí (Bra) <sup>27</sup>           | 44          | 11,0        | 2,0         | 0,0         | 87,0        | 0,0        | 0,246        |
| 21. Cinta Larga (Bra) <sup>28,29</sup>  | 20          | 20,0        | 0,0         | 20,0        | 60,0        | 0,0        | 0,590        |
| 22. Munduruku (Bra) <sup>28</sup>       | 40          | 13,0        | 15,0        | 10,0        | 62,0        | 0,0        | 0,576        |
| 23. Parakanã (Bra) <sup>28,29</sup>     | 13          | 8,0         | 23,0        | 46,0        | 23,0        | 0,0        | 0,731        |
| 24. Urubu-Kaapor (Bra) <sup>28,29</sup> | 42          | 22,0        | 33,0        | 14,0        | 31,0        | 0,0        | 0,745        |
| 25. Coreguaje (Col) <sup>5</sup>        | 42          | 5,0         | 22,0        | 64,0        | 2,0         | 7,0        | 0,546        |
| 26. Siona (Col) <sup>5</sup>            | 12          | 75,0        | 17,0        | 8,0         | 0,0         | 0,0        | 0,439        |
| 27. Tucano (Col) <sup>1,5</sup>         | 31          | 3,0         | 20,0        | 27,0        | 47,0        | 3,0        | 0,682        |
| 28. Barasano (Col) <sup>1</sup>         | 5           | 80,0        | 0,0         | 0,0         | 20,0        | 0,0        | 0,400        |
| 29. Tuyuca (Col) <sup>1</sup>           | 6           | 17,0        | 50,0        | 0,0         | 17,0        | 16,0       | 0,800        |
| 30. Yeral (Col) <sup>1</sup>            | 8           | 12,5        | 12,5        | 50,0        | 25,0        | 0,0        | 0,750        |
| 31. Piratapuyo (Col) <sup>1</sup>       | 8           | 12,5        | 12,5        | 50,0        | 12,5        | 12,5       | 0,786        |
| <i>TUCANO- EQUATORIAL TOTAL</i>         | <i>1164</i> | <i>22,9</i> | <i>16,2</i> | <i>28,6</i> | <i>27,1</i> | <i>5,3</i> | <i>0,637</i> |

---

**CHIBCHA**

---

| <b>Population</b>                           | <b>N</b> | <b>A</b> | <b>B</b> | <b>C</b> | <b>D</b> | <b>E</b> | <b>Diversity</b> |
|---------------------------------------------|----------|----------|----------|----------|----------|----------|------------------|
| 32. Teribe (Pan) <sup>6</sup>               | 20       | 80,0     | 20,0     | 0,0      | 0,0      | 0,0      | 0,337            |
| 33. Guatasa (Cost. ric) <sup>6</sup>        | 20       | 85,0     | 15,0     | 0,0      | 0,0      | 0,0      | 0,268            |
| 34. Kuna (Pan/Col) <sup>5,6,7</sup>         | 109      | 64,0     | 25,0     | 10,0     | 0,0      | 1,0      | 0,356            |
| 35. Bribri-Cabecar (Cost. ric) <sup>6</sup> | 24       | 54,0     | 46,0     | 0,0      | 0,0      | 0,0      | 0,518            |
| 36. Huetar (Cost. ric) <sup>8</sup>         | 27       | 70,0     | 4,0      | 0,0      | 26,0     | 0,0      | 0,453            |
| 37. Ngöbe (Pan) <sup>7</sup>                | 62       | 68       | 32       | 0        | 0        | 0,0      | 0,444            |
| 38. Cayapa (Ecu) <sup>9</sup>               | 120      | 29,0     | 40,0     | 9,0      | 22,0     | 0,0      | 0,706            |
| 39. Atcemeños (Chi) <sup>10,34,35</sup>     | 136      | 12,0     | 68,0     | 15,0     | 5,0      | 0,0      | 0,498            |

|                                          |             |             |             |             |            |            |              |
|------------------------------------------|-------------|-------------|-------------|-------------|------------|------------|--------------|
| 40. Arhuaco (Ecu/Col) <sup>1,5,2,3</sup> | 141         | 89,0        | 3,0         | 8,0         | 0,0        | 0,0        | 0,196        |
| 41. Yanomamö (Bra) <sup>6,20,21,36</sup> | 288         | 3,0         | 17,0        | 58,0        | 18,0       | 4,0        | 0,602        |
| 42. Chimila (Col) <sup>1,5</sup>         | 56          | 92,0        | 3,0         | 1,0         | 3,0        | 1,0        | 0,203        |
| 43. Waunana (Col) <sup>5,22</sup>        | 60          | 0,0         | 63,0        | 30,0        | 7,0        | 0,0        | 0,513        |
| 44. Arsario (Col) <sup>1,5,2,3</sup>     | 116         | 39,0        | 3,0         | 55,0        | 0,0        | 3,0        | 0,504        |
| 45. Guane-Butaregua (Col) <sup>5</sup>   | 33          | 12,0        | 64,0        | 0,0         | 24,0       | 0,0        | 0,538        |
| 46. Boruca (A.central) <sup>6</sup>      | 14          | 21,0        | 72,0        | 0,0         | 7,0        | 0,0        | 0,473        |
| 47. Kogui (Col) <sup>1,5,2,11</sup>      | 160         | 58,0        | 0,0         | 42,0        | 0,0        | 0,0        | 0,490        |
| 48. Awa-Kuaikier (Col) <sup>4</sup>      | 35          | 9,0         | 69,0        | 0,0         | 14,0       | 8,0        | 0,509        |
| 49. Embera (Col) <sup>1,4,23,26</sup>    | 82          | 42,0        | 36,0        | 10,0        | 2,0        | 10,0       | 0,683        |
| <b>CHIBCHAS TOTAL</b>                    | <b>1503</b> | <b>45,9</b> | <b>32,2</b> | <b>13,2</b> | <b>7,1</b> | <b>1,5</b> | <b>0,461</b> |

#### ANDEAN

| Population                                      | N   | A    | B    | C    | D    | E   | Diversity |
|-------------------------------------------------|-----|------|------|------|------|-----|-----------|
| 50. Aymara (Chi/Per/Bol) <sup>10,13,32,34</sup> | 377 | 6,0  | 75,0 | 8,0  | 10,0 | 1,0 | 0,418     |
| 51. Quechua (Per/Bol) <sup>10,13,32</sup>       | 143 | 10,0 | 77,0 | 7,0  | 6,0  | 0,0 | 0,393     |
| 52. Mapuche (Chi/Arg) <sup>12,14,24,30</sup>    | 311 | 4,0  | 24,0 | 32,0 | 35,0 | 5,0 | 0,714     |
| 53. Huilliche (Chi) <sup>10,24</sup>            | 118 | 5,0  | 29,0 | 18,0 | 48,0 | 0,0 | 0,655     |
| 54. Pehuenche (Chi) <sup>10,24</sup>            | 205 | 2,0  | 10,0 | 39,0 | 49,0 | 0,0 | 0,602     |
| 55. Fuegian (Arg) <sup>15</sup>                 | 45  | 0,0  | 0,0  | 43,0 | 57,0 | 0,0 | 0,499     |
| 56. Ingano (Col) <sup>1,5,23,26</sup>           | 139 | 26,0 | 34,0 | 38,0 | 1,0  | 1,0 | 0,673     |
| 57. Jujeños (Arg) <sup>16</sup>                 | 65  | 12,0 | 65,0 | 8,0  | 15,0 | 0,0 | 0,546     |
| 58. Arequipa (Per) <sup>33</sup>                | 22  | 9,0  | 68,0 | 14,0 | 9,0  | 0,0 | 0,524     |
| 59. Tayacaja (Per) <sup>33</sup>                | 61  | 21,0 | 33,0 | 13,0 | 30,0 | 3,0 | 0,754     |
| 60. Ancash (Per) <sup>35</sup>                  | 33  | 9,0  | 52,0 | 18,0 | 21,0 | 0,0 | 0,669     |

|                                            |             |            |             |             |             |            |              |
|--------------------------------------------|-------------|------------|-------------|-------------|-------------|------------|--------------|
| 61. Aónikenk (Arg/Chi) <sup>15,35,37</sup> | 48          | 0,0        | 7,0         | 34,0        | 59,0        | 0,0        | 0,553        |
| 62. Yahgan (Arg/Chi) <sup>15,24,37</sup>   | 37          | 0          | 0           | 73          | 27          | 0          | 0,405        |
| 63. Kawéskar (Arg/Chi) <sup>15,37</sup>    | 26          | 0,0        | 0,0         | 29,0        | 71,0        | 0,0        | 0,443        |
| 64. Selk'nam (Arg/Chi) <sup>15,37</sup>    | 15          | 0,0        | 0,0         | 73,0        | 23,0        | 4,0        | 0,448        |
| <b>ANDEAN TOTAL</b>                        | <b>1645</b> | <b>6,9</b> | <b>31,6</b> | <b>29,8</b> | <b>30,7</b> | <b>0,9</b> | <b>0,553</b> |

#### **GE-PANO-CARIB**

| <b>Comunidad</b>                       | <b>N</b>   | <b>A</b>    | <b>B</b>    | <b>C</b>    | <b>D</b>    | <b>E</b>   | <b>Diversity</b> |
|----------------------------------------|------------|-------------|-------------|-------------|-------------|------------|------------------|
| 65. Huitoto (Col) <sup>5,23</sup>      | 35         | 21,0        | 2,0         | 27,0        | 46,0        | 4,0        | 0,691            |
| 66. Yagua (Col) <sup>23</sup>          | 12         | 25,0        | 0,0         | 67,0        | 8,0         | 0,0        | 0,530            |
| 67. Mataco (Arg) <sup>6,18,19,25</sup> | 228        | 11,0        | 50,0        | 9,0         | 29,0        | 1,0        | 0,649            |
| 68. Toba (Arg) <sup>25</sup>           | 67         | 18,0        | 43,0        | 5,0         | 34,0        | 0,0        | 0,671            |
| 69. Chorote (Arg) <sup>19,24</sup>     | 34         | 14,0        | 45,0        | 22,0        | 19,0        | 0,0        | 0,718            |
| 70. Xavante (Bra) <sup>17</sup>        | 25         | 16,0        | 84,0        | 0,0         | 0,0         | 0,0        | 0,280            |
| 71. Pilaga (Arg) <sup>18</sup>         | 41         | 5,0         | 37,0        | 27,0        | 29,0        | 2,0        | 0,723            |
| 72. Chimane (Bol) <sup>13</sup>        | 41         | 39,0        | 54,0        | 5,0         | 0,0         | 2,0        | 0,571            |
| 73. Mosen (Bol) <sup>13</sup>          | 20         | 40,0        | 55,0        | 0,0         | 0,0         | 5,0        | 0,563            |
| 74. Makiritare(Ven) <sup>31</sup>      | 10         | 20,0        | 0,0         | 70,0        | 10,0        | 0,0        | 0,511            |
| 75. Macushi (Bra) <sup>31</sup>        | 10         | 10,0        | 20,0        | 30,0        | 40,0        | 0,0        | 0,778            |
| 76. Marubo (Bol) <sup>31</sup>         | 10         | 10,0        | 0,0         | 60,0        | 30,0        | 0,0        | 0,600            |
| 77. Krahó (Bra) <sup>6,31</sup>        | 22         | 40,0        | 47,0        | 13,0        | 0,0         | 0,0        | 0,636            |
| 78. Xikrin (Bra) <sup>28,29</sup>      | 43         | 37,0        | 63,0        | 0,0         | 0,0         | 0,0        | 0,478            |
| 79. Murui-Muinane (Col) <sup>5</sup>   | 19         | 11,0        | 21,0        | 37,0        | 26,0        | 5,0        | 0,778            |
| 80. Kaingang (Bra) <sup>36</sup>       | 78         | 52,2        | 3,0         | 45,0        | 0,0         | 0,0        | 0,529            |
| <b>GE-PANO-CARIB TOTAL</b>             | <b>695</b> | <b>23,1</b> | <b>32,8</b> | <b>26,1</b> | <b>16,9</b> | <b>1,2</b> | <b>0,607</b>     |

**Not classified**

| <b>Population</b>            | <b>Nº</b> | <b>A</b> | <b>B</b> | <b>C</b> | <b>D</b> | <b>E</b> | <b>Diversity</b> |
|------------------------------|-----------|----------|----------|----------|----------|----------|------------------|
| 81. Paez <sup>1,5,23</sup>   | 87        | 49,0     | 12,0     | 26,0     | 13,0     | 1,0      | 0,675            |
| 82. Guambiano <sup>1,5</sup> | 47        | 4,0      | 8,0      | 72,0     | 6,0      | 0,0      | 0,455            |

**Afrodescendant Colombian populations**

| <b>Population</b>             | <b>Nº</b> | <b>A</b> | <b>B</b> | <b>C</b> | <b>D</b> | <b>L</b> | <b>E</b> |
|-------------------------------|-----------|----------|----------|----------|----------|----------|----------|
| 83. Nuqui <sup>38</sup>       | 33        | 0,151    | 0,061    | 0,0      | 0,0      | 0,394    | 0,394    |
| 84. San-Basilio <sup>38</sup> | 38        | 0,053    | 0,053    | 0,0      | 0,026    | 0,447    | 0,421    |
| 85. Providencia <sup>38</sup> | 40        | 0,100    | 0,0      | 0,0      | 0,0      | 0,525    | 0,375    |

**African Populations**

| <b>Population</b>               | <b>Nº</b> | <b>A</b> | <b>B</b> | <b>C</b> | <b>D</b> | <b>L</b> | <b>E</b> |
|---------------------------------|-----------|----------|----------|----------|----------|----------|----------|
| 86. Kung <sup>39</sup>          | 33        | 0,0      | 0,0      | 0,0      | 0,0      | 1        | 0,0      |
| 87. Mbuti-Pygmyes <sup>39</sup> | 38        | 0,0      | 0,0      | 0,0      | 0,0      | 1        | 0,0      |
| 88. Biaka-Pygmyes <sup>39</sup> | 40        | 0,0      | 0,0      | 0,0      | 0,0      | 1        | 0,0      |

References: (1) Present study; (2) Melton *et al.*, 2007; (3) Briceño *et al.*, 2003; (4) Barreto *et al.*, 2006; (5) Keyeux *et al.*, 2002; (6) Torroni *et al.*, 1993a; (7) Kolman *et al.*, 1995; (8) Santos *et al.*, 1994; (9) Rickards *et al.*, 1999; (10) Merriwether *et al.*, 1995; (11) Merriwether *et al.*, 1997; (12) Bailliet *et al.*, 1994, (13) Bert *et al.*, 2001; (14) Ginther *et al.*, 1993; (15) Lalueza *et al.*, 1996/97; (16) Dipierri *et al.*, 1998; (17) Ward *et al.*, 1996; (18) Demarchi *et al.*, 2001; (19) Bianchi *et al.*, 1995; (20) Williams *et al.*, 2002; (21) Lobato-da-Silva *et al.*, 2001, citado por Melton *et al.*, 2007; (22) Kolman y Bermingham, 1997; (23) Torres *et al.*, 2006; (24) Moraga *et al.*, 2000; (25) Cabana *et al.*, 2005; (26) Mesa *et al.*, 2000; (27) Bonatto y Salzano, 1997; (28) Ribeiro-dos-santos *et al.*, citado por Marrero *et al.*, 2006; (29) Dornelles *et al.*, 2005; (30) Horai *et al.*, 1993; (31) Torroni *et al.*, 1993a; (32) Sandoval *et al.*, 2004; (33) Fuselli *et al.*, 2003; (34) Rothhammer *et al.*, 2002; (35) Stone *et al.*, 2004; (36) Easton *et al.*, 1996; (37) García-Bouret *et al.*, 2004; (38) Rodas *et al.*, 2002; (39) Chen *et al.*, 2000
